# Supplementary material
Source: PubMed Central journal article supplement (PMC8504426)
Supplement: 41409_2021_1487_MOESM1_ESM.pdf [file 41409_2021_1487_MOESM1_ESM.pdf]

1 **MATERIAL AND METHODS**

2 **Peripheral blood sample preparation**

3 Peripheral blood (PB) samples (8 ml of whole blood in EDTA) were collected and immediately used for total  
4 mononuclear cell (MC) isolation. Whole blood was diluted with phosphate buffer saline (PBS) 1:1 (v/v), then  
5 subjected to a density gradient stratification with Lymphoprep (Euroclone), at 500xg for 30 minutes. The  
6 white ring interface containing peripheral blood mononuclear cells (PBMC) was collected, washed in PBS,  
7 and then frozen in cryovials in liquid nitrogen containers.

8

9 **PBMC stimulation**

10 Subsequently, cells were thawed, counted, and resuspended at  $2 \times 10^6$ /ml in RPMI-1640 medium  
11 (Euroclone), supplemented with 10% fetal bovine serum (FBS) (Euroclone), 2 mM l-glutamine (Euroclone),  
12 100 U/ml penicillin and 100 µg/ml streptomycin (Euroclone), 2 hours in incubator at 37°C, 5% CO<sub>2</sub>. Next,  
13 cells were counted and used for subsequent flow cytometry characterization and IFN $\gamma$  ELISpot analysis.  
14 Cells were stimulated with 6nM of 15-mer peptides overlapping 11 amino acids of full-length Spike protein  
15 (Miltenyi Biotec) for 6 hours. The last 4 hours of stimulation, cells received brefeldin (Golgi-Plug, BD  
16 Bioscience), according to the manufacturer indications [1].

17

18 **Flow cytometry analysis**

19 Following cell stimulation, PBMC were stained for 30 minutes, 4°C, at dark with the following anti-human  
20 antibodies against the listed surface antigens: CD3-BB700 (clone: OKT3), CD4-APC (clone: SK3), CD8-  
21 PECF594 (clone: HIT8a), (all purchased by BD Biosciences). For intracellular cytokine detection, cells were  
22 fixed and permeabilized using the Cytofix and Cytoperm fixation and permeabilization kit (BD) for 10 min at  
23 4°C. Cells were then washed in PBS and stained for 30 minutes, 4°C, at dark, with the anti-human IFN $\gamma$ -  
24 BV650 (clone: 4S.B3), antibody (BD Biosciences) [2]. Cells were analyzed using a BD FACS Fortessa x20,

25 equipped with 5 lasers, for T cell analysis and IFN $\gamma$  production. Viable cells were identified, based on FSC-A  
26 and SSC-A gating. T cell subset populations were set on CD3 $^+$  gated cells, then interrogated for CD4 $^+$ , CD8 $^+$ ,  
27 CD4 $^+$ IFN $\gamma^+$  and CD8 $^+$ IFN $\gamma^+$  cells. Flow data were analyzed using the FlowJo v10 software (TreeStar).

28

### 29 **IFN $\gamma$ ELISpot**

30 IFN $\gamma$  ELISpot analysis was performed ex vivo using whole PBMC after thawing [3]. Tests were performed in  
31 duplicate and with a positive control (anti-CD3 monoclonal antibody 2  $\mu$ g/well) (Miltenyi Biotec). PVDF  
32 filter 96 well plates (R&D Systems) pre-coated with IFN $\gamma$ -specific antibodies (EL285 ELISpot kit, R&D  
33 Systems) were washed with PBS and blocked with complete medium (Euroclone) containing for 1h. PBMC  
34 at  $5 \times 10^5$ /well were stimulated for 16–20 h with an overlapping peptide pool representing full-length Spike  
35 protein. Bound IFN $\gamma$  was visualized using a secondary anti-IFN $\gamma$  polyclonal biotinylated antibody for 2h.  
36 Then plates were washed 4 times with kit buffer and then incubated with alkaline phosphatase-conjugated  
37 streptavidin for other 2h, followed by washing and then incubation with a 5-bromo-4-chloro-3'-indolyl  
38 phosphate (BCIP)/nitro blue tetrazolium (NBT) substrate (EL285 ELISpot kit, R&D Systems). Spot forming  
39 cells (SFC) were counted by a stereomicroscope and were summarized as mean values of each duplicate.  
40 For the determination of anti-Spike T cell response frequencies negative control values were subtracted  
41 from the positive values. Values were defined as positive if there was >2 times the negative value and with  
42 at least 5 SFC per well [4,5].

43 **References**

- 44 1) Sahin U, Muik A, Derhovanessian E, Vogler I, Kranz LM, Vormehr M, *et al.* COVID-19 vaccine BNT162b1  
45 elicits human antibody and T<sub>H</sub>1 T cell responses. *Nature* 2020; 586:594-599.
- 46 2) Gallazzi M, Baci D, Mortara L, Bosi A, Buono G, Naselli A, *et al.* Prostate Cancer Peripheral Blood NK  
47 Cells Show Enhanced CD9, CD49a, CXCR4, CXCL8, MMP-9 Production and Secrete Monocyte-Recruiting  
48 and Polarizing Factors. *Front Immunol* 2021; 11:586126.
- 49 3) Mortara L, Gras-Masse H, Rommens C, Venet A, Guillet JG, Bourgault-Villada I. Type 1 CD4(+) T-cell help  
50 is required for induction of antipeptide multispecific cytotoxic T lymphocytes by a lipopeptidic vaccine  
51 in rhesus macaques. *J Virol* 1999; 73:4447-51.
- 52 4) Gallais F, Velay A, Nazon C, Wendling MJ, Partisani M, Sibia J, *et al.* Intrafamilial Exposure to SARS-CoV-  
53 2 Associated with Cellular Immune Response without Seroconversion, France. *Emerg Infect Dis* 2021;  
54 27:113–21.
- 55 5) Pulendran B, Arunachalam PS. Systems biological assessment of human immunity to BNT162b2 mRNA  
56 vaccination. *Res Sq* 2021; e-pub ahead of print 22 April 2021; doi: 10.21203/rs.3.rs-438662/

57 **Table ST1: Main characteristics of the 64 patients with hematological malignancies who underwent**  
 58 **autologous stem cell transplantation at the time of anti-SARS-CoV-2 vaccine.**

| Characteristics                                      | Number, unless otherwise specified |
|------------------------------------------------------|------------------------------------|
| Number of patients                                   | 64                                 |
| Median age, years (range)                            | 62 (29-75)                         |
| Male (%)                                             | 37 (58)                            |
| ASCT as last therapy (%)                             | 32 (50)                            |
| HM types (%)                                         |                                    |
| Multiple myeloma                                     | 45 (70)                            |
| Plasma cell leukemia                                 | 1 (2)                              |
| Follicular lymphoma                                  | 6 (9)                              |
| Hodgkin lymphoma                                     | 5 (8)                              |
| Mantle cell lymphoma                                 | 2 (3)                              |
| Mediastinal B-cell lymphoma                          | 2 (3)                              |
| Diffuse large B-cell lymphoma                        | 1 (2)                              |
| Angioimmunoblastic T-cell lymphoma                   | 1 (2)                              |
| NK/T-cell lymphoma                                   | 1 (2)                              |
| Stable/progressive disease at vaccination (%)        | 9 (14)                             |
| Previous Covid-19 (%)                                | 2 (3)                              |
| Median time from ASCT to vaccination, months (range) | 25.6 (1.2-58.1)                    |
| Median time from vaccination to test, days (range)   | 28 (25-48)                         |

59 ASCT: autologous stem cell transplantation; HM: hematological malignancy.

60 **Table ST2: Seroconversion rates according to last therapy.**

| LAST THERAPY       | N° of PATIENTS (%) |  | SEROLOGY RESULTS |               |
|--------------------|--------------------|--|------------------|---------------|
|                    |                    |  | POSITIVE (%)     | NEGATIVE (%)  |
| <b>ASCT</b>        | 32 (50)            |  | 31 (48)          | 1 (2)         |
| <b>IMIDs</b>       | 15 (23)            |  | 14 (21)          | 1 (2)         |
| <i>ongoing</i>     | 13 (20)            |  | 12 (18)          | 1 (2)         |
| <i>not ongoing</i> | 2 (3)              |  | 2 (3)            | 0             |
| <b>Dara-RD</b>     | 9 (14)             |  | 5 (8)            | 4 (6)         |
| <i>ongoing</i>     | 8 (12)             |  | 4 (6)            | 4 (6)         |
| <i>not ongoing</i> | 1 (2)*             |  | 1 (2)*           | 0             |
| <b>Rituximab</b>   | 1 (2)              |  | 0                | 1 (2)         |
| <i>ongoing</i>     | 1 (2)              |  | 0                | 1 (2)         |
| <b>BsAb</b>        | 1 (2)              |  | 0                | 1 (2)         |
| <i>ongoing</i>     | 1 (2)              |  | 0                | 1 (2)         |
| <b>PIs</b>         | 2 (3)              |  | 2 (3)            | 0             |
| <i>ongoing</i>     | 2 (3)              |  | 2 (3)            | 0             |
| <b>CHT/RT</b>      | 2 (3)              |  | 2 (3)            | 0             |
| <i>ongoing</i>     | 1 (2)              |  | 1 (2)            | 0             |
| <i>not ongoing</i> | 1 (2)              |  | 1 (2)            | 0             |
| <b>Allo-SCT</b>    | 1 (2)              |  | 1 (2)            | 0             |
| <b>Supportive</b>  | 1 (2)              |  | 1 (2)            | 0             |
| <b>ALL</b>         | <b>64 (100)</b>    |  | <b>56 (87)</b>   | <b>8 (13)</b> |

61 \*: Dara-RD therapy was discontinued 2.7 months before vaccination.

62 ASCT: autologous stem cell transplantation; IMIDs: immunomodulatory drugs; Dara-RD:

63 daratumumab/lenalidomide/dexamethasone; BsAb: bispecific antibody; PIs: proteasome inhibitors; CHT/RT:

64 chemo/radiotherapy; Allo-SCT: allogeneic stem cell transplantation.

65 **Table ST3: Detailed immune data per individual patient.**

| Patient ID | Disease                            | Last treatment | Serology (POS/NEG) | Ab titer (BAU/ml) | ELISpot (SFC/10 <sup>6</sup> PBMC) |
|------------|------------------------------------|----------------|--------------------|-------------------|------------------------------------|
| 1          | Plasma Cell Myeloma                | IMiDs          | POS                | 1767              | 42                                 |
| 2          | Classic Hodgkin Lymphoma           | Palliative     | POS                | 1112              | 0                                  |
| 5          | Plasma Cell Myeloma                | IMiDs          | POS                | 1092              | 102                                |
| 6          | Follicular Lymphoma                | ASCT           | NEG                | -                 | 0                                  |
| 7          | Follicular Lymphoma                | ASCT           | POS                | 1254              | 158                                |
| 944-2      | Plasma Cell Myeloma                | Dara-RD        | NEG                | -                 | 130                                |
| 944-5      | Plasma Cell Myeloma                | ASCT           | POS                | 109               | 180                                |
| 944-7      | Plasma Cell Myeloma                | Dara-RD        | POS                | 112               | 0                                  |
| 944-24     | Follicular Lymphoma                | BsAb           | NEG                | -                 | 72                                 |
| 944-30     | Plasma Cell Myeloma                | Dara-RD        | POS                | 101               | 30                                 |
| 944-47     | Plasma Cell Myeloma                | Dara-RD        | NEG                | -                 | 0                                  |
| 944-50     | Angioimmunoblastic T-cell Lymphoma | IMiDs          | NEG                | -                 | 57                                 |
| 944-54     | Plasma Cell Myeloma                | ASCT           | POS                | 166               | 9                                  |
| 944-57     | Plasma Cell Myeloma                | Dara-RD        | NEG                | -                 | 0                                  |
| 944-62     | Follicular Lymphoma                | Rituximab      | NEG                | -                 | 92                                 |
| 944-80     | Plasma Cell Myeloma                | Dara-RD        | NEG                | -                 | 0                                  |

66 SFC: spot forming cells; PBMC: peripheral blood mononuclear cells; ASCT: autologous stem cell transplantation; IMiDs:

67 immunomodulatory drugs; Dara-RD: daratumumab/lenalidomide/dexamethasone; BsAb: bispecific antibody.
